# Supplementary material
Source: publisher figshare collection journal article supplement (https://frontiersin.figshare.com/ndownloader/files/31764167)
Supplement: Supplementary file 1 [file 31764167]

Table S3. Results of Akaike information criterion (AIC)-based model selection, assessing the association between the proportion of females to males of three bat species with seasonality and vegetation attributes. Confidence set of plausible models (95 %) explaining the variation in the response variables. Highest ranked models explaining gender variation for each species are in bold

| Bat species | Factor | *K* | logLik | AICc | Δ*i* | *wi* |
| --- | --- | --- | --- | --- | --- | --- |
| *Artibeus jamaicencis* | Null Model | 2 | -59.81 | 124.94 | 0.00 | 0.41 |
|  | Tree species composition | 3 | -59.40 | 127.79 | 2.85 | 0.10 |
|  | Habitat | 3 | -59.46 | 127.92 | 2.98 | 0.09 |
|  | Total tree basal area | 3 | -59.63 | 128.25 | 3.31 | 0.08 |
|  | Average height of trees | 3 | -59.69 | 128.38 | 3.43 | 0.07 |
|  | Season | 3 | -59.76 | 128.51 | 3.57 | 0.07 |
| *Artibeus lituratus* | Season | 3 | **-72.49** | **151.35** | **0.00** | **1** |
|  | Habitat | 3 | -89.39 | 185.15 | 33.80 | 0 |
|  | Null model | 2 | -90.72 | 185.62 | 34.27 | 0 |
|  | Average height of trees | 3 | -90.42 | 187.21 | 35.86 | 0 |
|  | Tree species composition | 3 | -90.69 | 187.74 | 36.39 | 0 |
|  | Total tree basal area | 3 | -90.72 | 187.80 | 36.45 | 0 |
| *Sturnira lilium* | Tree species composition | 3 | **-86.88** | **180.12** | **0.00** | **0.88** |
|  | Season | 3 | **-89.03** | **184.42** | **4.30** | **0.10** |
|  | Null model | 2 | -92.56 | 189.30 | 9.18 | 0.01 |
|  | Average height of trees | 3 | -92.52 | 191.40 | 11.28 | 0.00 |
|  | Habitat | 3 | -92.54 | 191.44 | 11.33 | 0.00 |
|  | Total tree basal area | 3 | -92.55 | 191.46 | 11.34 | 0.00 |
| *Carollia perspicillata* | Null model | 2 | -31.27 | 66.72 | 0.00 | 0.30 |
|  | Habitat | 3 | -30.43 | 67.21 | 0.49 | 0.23 |
|  | Season | 3 | -30.95 | 68.27 | 1.55 | 0.14 |
|  | Tree species composition | 3 | -31.09 | 68.55 | 1.82 | 0.12 |
|  | Total tree basal area | 3 | -31.15 | 68.67 | 1.95 | 0.11 |
|  | Average height of trees | 3 | -31.27 | 68.90 | 2.18 | 0.10 |
| *Glossophaga soricina* | Total tree basal area | 3 | **-26.45** | **59.27** | **0.00** | **0.63** |
|  | Average height of trees | 3 | **-28.23** | **62.82** | **3.55** | **0.11** |
|  | Null model | 2 | -29.46 | 63.10 | 3.84 | 0.09 |
|  | Tree species composition | 3 | -28.48 | 63.31 | 4.05 | 0.08 |
|  | Habitat | 3 | -28.98 | 64.33 | 5.06 | 0.05 |
|  | Season | 3 | -29.44 | 65.24 | 5.97 | 0.03 |
| *Platyrrhinus helleri* | Null model | 2 | -30.69 | 65.56 | 0.00 | 0.33 |
|  | Season | 3 | -30.22 | 66.80 | 1.24 | 0.18 |
|  | Total tree basal area | 3 | -30.57 | 67.51 | 1.95 | 0.13 |
|  | Habitat | 3 | -30.61 | 67.59 | 2.03 | 0.12 |
|  | Average height of trees | 3 | -30.63 | 67.62 | 2.06 | 0.12 |
|  | Tree species composition | 3 | -30.65 | 67.67 | 2.11 | 0.12 |

K, number of estimated parameters; logLik, log-likelihood; AICc, sampled-sized adjusted Akaike information criterion; ∆i, Akaike differences; and wi, Akaike weights. Response variable: proportion of females to males per night. Explanatory variables: Habitat, Season (rainy, dry), Tree species composition (using scores of NMDS axis), Total basal area at each site, Average height of trees at each site.
